# Supplementary material for: Measuring ligand efficacy at the mu-opioid receptor using a conformational biosensor
Source: eLife journal article supplement (doi:10.7554/elife.32499), 2018-06-22
Supplement: supp [file elife-32499-supp-v1.zip]

Archive with 2 entries (2 files):
- elife_poa_e32499_Transparent_Reporting_File.pdf
- elife_poa_e32499_Figure_3_source_data_1.docx
