# Supplementary material for: Measuring ligand efficacy at the mu-opioid receptor using a conformational biosensor
Source: eLife journal article supplement (doi:10.7554/elife.32499), 2018-06-22
Supplement: supp [file elife-32499-supp-v1.zip › elife_poa_e32499_Figure_3_source_data_1.docx]

| **Figure 3- Source Data** | | |  |  |  |  |
| --- | --- | --- | --- | --- | --- | --- |
|  |  |  |  |  |  |  |
| **Drug #** | **t1/2 (sec)** | **G Protein (Max)** | **Ehlert, e** | **Log Affinity Shift Na+/GTPgS** | **Log() [GTPS]** | **Log() [arrestin]** |
| 1 | 3.5 | 100 | 4.7 |  | n/a | n/a |
| 2 | 3.9 | 100 | 2.1 | 1.34 | n/a | 0.86 |
| 3 | 7.1 | 100 | 3.6 | 1.25 | n/a | 0.56 |
| 4 | 3.6 | 100 | 1.1 | 1.35 | n/a | n/a |
| 5 | 8.5 | 61 | 0.5 | 1.2 | 0.24 | 0.22 |
| 6 | 29.7 | 5 | n/a | 1 | -1.39 | n/a |
| 7 | 6.9 | 94 | 1.2 | 1.25 | n/a | 0.84 |
| 8 | 3.2 | 86 | 2.9 | 1.31 | n/a | n/a |
| 9 | 15.9 | 57 | n/a | n/a | 0.12 | 0.23 |
| 10 | 3.9 | 100 | 4.7 | n/a | n/a | 0.8 |
| 11 | 9.2 | 61 | 0.5 | 1.23 | 0.23 | 0.64 |
| 12 | 5.3 | 100 | 1.8 | 1.3 | n/a | 0.86 |
| 13 | 16.7 | 58 | n/a | n/a | 0.11 | n/a |
| 14 | 11.9 | 21 | 0.2 | 1.02 | -0.626 | n/a |
